1 **TITLE PAGE**

2 **Title: Serial interval, basic reproduction number and prediction of COVID-19**  
3 **epidemic size in Jodhpur, India**

4 **Authors and affiliations:**

5 Suman Saurabh<sup>1\*</sup>, Mahendra Kumar Verma<sup>2</sup>, Vaishali Gautam<sup>3</sup>, Akhil Goel<sup>4</sup>, Manoj  
6 Kumar Gupta<sup>5</sup>, Pankaj Bhardwaj<sup>6</sup>, Sanjeev Misra<sup>7</sup>

7 \* Corresponding author

8 <sup>1</sup> Assistant Professor, Department of Community Medicine and Family Medicine, All  
9 India Institute of Medical Sciences (AIIMS), Jodhpur, Rajasthan 342005, India,  
10 Mobile: +91 7766906623, E-mail: [drsumansaurabh@gmail.com](mailto:drsumansaurabh@gmail.com) /  
11 [saurabhs@aiimsjodhpur.edu.in](mailto:saurabhs@aiimsjodhpur.edu.in)

12 <sup>2</sup> Senior Resident, Department of Community Medicine and Family Medicine, All  
13 India Institute of Medical Sciences (AIIMS), Jodhpur, Rajasthan 342005, India,  
14 Mobile: +91 9462823592, E-mail: [verma.udr@gmail.com](mailto:verma.udr@gmail.com)

15 <sup>3</sup> Senior Resident, Department of Community Medicine and Family Medicine, All  
16 India Institute of Medical Sciences (AIIMS), Jodhpur, Rajasthan 342005, India,  
17 Mobile: +91 9958331636, E-mail: [drvaishaligautam125@gmail.com](mailto:drvaishaligautam125@gmail.com)

18 <sup>4</sup> Assistant Professor, Department of Community Medicine and Family Medicine, All  
19 India Institute of Medical Sciences (AIIMS), Jodhpur, Rajasthan 342005, India,  
20 Mobile: +91 9643158274, E-mail: [doc.akhilgoel.aiims@gmail.com](mailto:doc.akhilgoel.aiims@gmail.com)

21 <sup>5</sup> Associate Professor, Department of Community Medicine and Family Medicine, All  
22 India Institute of Medical Sciences (AIIMS), Jodhpur, Rajasthan 342005, India,  
23 Mobile: +91 8003996087, E-mail: [drmkqbhu@gmail.com](mailto:drmkqbhu@gmail.com)

24

25 <sup>6</sup> Additional Professor, Department of Community Medicine and Family Medicine, All  
26 India Institute of Medical Sciences (AIIMS), Jodhpur, Rajasthan 342005, India,  
27 Mobile: +91 8003996903, E-mail: [pankajbhardwajdr@gmail.com](mailto:pankajbhardwajdr@gmail.com)

28 <sup>7</sup> Director, All India Institute of Medical Sciences (AIIMS), Jodhpur, Rajasthan  
29 342005, India, Mobile: +91 9919140407, E-mail: [misralko@gmail.com](mailto:misralko@gmail.com)

## 30 **ABSTRACT**

31 **Background:** Understanding the epidemiology of COVID-19 is important for design  
32 of effective control measures at local level. We aimed to estimate the serial interval  
33 and basic reproduction number for Jodhpur, India and to use it for prediction of  
34 epidemic size for next one month.

35 **Methods:** Contact tracing of SARS-CoV-2 infected individuals was done to obtain  
36 the serial intervals. Aggregate and instantaneous  $R_0$  values were derived and  
37 epidemic projection was done using R software v4.0.0.

38 **Results:** From among 79 infector-infectee pairs, the estimated median and 95  
39 percentile values of serial interval were 5.98 days (95% CI 5.39 – 6.65) and 13.17  
40 days (95% CI 11.27 – 15.57), respectively. The overall  $R_0$  value in the first 30 days  
41 of outbreak was 1.64 (95% CI 1.12 – 2.25) which subsequently decreased to 1.07  
42 (95% CI 1.06 – 1.09). The instantaneous  $R_0$  value over 14 days window ranged from  
43 a peak of 3.71 (95% CI 1.85 -2.08) to 0.88 (95% CI 0.81 – 0.96) as on 24 June 2020.  
44 The projected COVID-19 case-load over next one month was 1881 individuals.  
45 Reduction of  $R_0$  from 1.17 to 1.085 could result in 23% reduction in projected  
46 epidemic size over the next one month.

47 **Conclusion:** Aggressive testing, contact-tracing and isolation of infected individuals  
48 in Jodhpur district resulted in reduction of  $R_0$ . Further strengthening of control  
49 measures could lead to substantial reduction of COVID-19 epidemic size. A data-  
50 driven strategy was found useful in surge capacity planning and guiding the public  
51 health strategy at local level.

## 52 **KEY WORDS**

53 SARS-CoV-2, COVID-19, serial interval, basic reproduction number, projection

## 54 **MANUSCRIPT TEXT**

### 55 **Introduction**

56 COVID-19 has emerged as the largest pandemic of 21<sup>st</sup> century with 10.5 million  
57 confirmed cases and half million deaths worldwide, as on 2 July 2020.<sup>1</sup> India has  
58 become the fourth most affected country worldwide with around 0.6 million confirmed  
59 COVID-19 cases.<sup>1</sup> COVID-19 is an emerging infectious disease with the onset of  
60 symptoms of first case having been reported from Wuhan, China in December  
61 2019.<sup>2</sup> Various epidemiological studies are being done to understand the  
62 transmission dynamics of the disease. Consequently, the estimated parameters such  
63 as serial interval and basic reproductive number ( $R_0$ ) are being used to guide the  
64 control strategies and to enable disease forecasting.<sup>3-5</sup>

65 In the early phase of the COVID-19 pandemic, India had adopted the policy of  
66 universal health-facility based isolation of all SARS-CoV-2 infected individuals  
67 irrespective of symptomatic status. However, in view of the increasing number of  
68 COVID-19 cases, home isolation of asymptomatic and mild cases was introduced on  
69 10 May 2020.<sup>6</sup> Therefore, it is important to achieve an epidemiological understanding

70 of COVID-19 situation at district level in the changed scenario so that it could be  
71 used to guide control measures and surge preparedness on a real-time basis.

72 Jodhpur is situated in the western part of India in Rajasthan state (Fig 1). The first  
73 COVID-19 case was an imported case reported on 9 March 2020 in Jodhpur, India.

## 74 **Methods**

### 75 *Serial interval estimation*

76 Individuals meeting suspect case definition for COVID-19 were tested with rRT-PCR  
77 (Real-Time Reverse Transcription-Polymerase Chain Reaction) at our institute in  
78 Jodhpur, India as per the national guidelines.<sup>7</sup> Those found positive for SARS-CoV-  
79 2, were further assessed for their contact history with known COVID-19 cases in  
80 their household. Serial interval was estimated based on the time duration between  
81 the symptom onsets of the infector-infectee pairs thus identified. For asymptomatic  
82 individuals, the date of collection of first positive sample was taken as a proxy for  
83 symptom onset. Mean and standard deviation of serial interval was calculated.  
84 Further, the serial interval data was fitted to weibull, log-normal, log-logistic and  
85 generalized gamma distributions using Flexsurv package in R software version  
86 4.0.0.<sup>8</sup> The estimates of median serial interval were taken from the best fitting model  
87 based on minimum Akaike Information Criterion (AIC) value. Standard maximum  
88 likelihood approach was used to obtain the best model fit to actual data.

### 89 *Estimation of $R_0$*

90 The basic reproduction number ( $R_0$ ) is defined as the average number of susceptible  
91 individuals infected by a single primary case.<sup>9</sup> The daily COVID-19 case data of  
92 Jodhpur district was converted to incidence object using Incidence package in R  
93 software.<sup>10</sup> EarlyR and EpiEstim packages in R software were used to estimate

94 overall and instantaneous values of basic reproduction number using the parameter  
95 estimates of serial interval, respectively.<sup>11,12</sup> Instantaneous  $R_0$  values were  
96 calculated based on method of estimating daily incidence based on a Poisson  
97 process determined by daily infectiousness, as proposed by Jombart and Nouvellet  
98 *et al.*<sup>10,13</sup> Here  $\lambda_t$ , the force of infection observed on day  $t$  is expressed by the  
99 following equation:

$$\lambda_t = \sum_{s=1}^{t-1} R_s y_s \omega_{t-s},$$

100 where  $y_s$  is the incidence of cases on day  $s$ .  $R_s$  is the instantaneous reproduction  
101 number on day  $s$ . The value of  $\omega_{t-s}$  is the probability mass distribution of the serial  
102 interval which represents the infectiousness of incident cases on day  $s$  in order to  
103 result in secondary cases on day  $t$ . As a practical approach used by earlier studies,  
104 we approximated day of reporting of the case as the day of onset, in the absence of  
105 exhaustive symptomatic history of each reported case.<sup>13</sup>

106 We also used another method by Wallinga and Teunis for estimation of the time  
107 varying  $R_0$  based on probability of transmission between infector-infectee pairs.<sup>14</sup>  
108 We used the parametric method of specifying the mean and standard deviation of  
109 serial interval distribution for both the methods. Time window of both 7 days and 14  
110 days was used for calculation of instantaneous  $R_0$ .

### 111 *Forecasting of the epidemic size*

112 Forecasting of daily and cumulative COVID-19 cases for the next 30 days was done  
113 based on the overall  $R_0$  value and based on  $R_0$  value of the past 30 days as input  
114 parameters using the Projections package in R.<sup>10</sup> As required, serial interval  
115 distribution was specified as scale and shape parameters of gamma distribution.

116 Forecasting of daily incidence was based on a Poisson process determined by daily  
117 infectiousness.<sup>13</sup> The specified serial interval distribution is taken as a prior while  
118 utilizing the Bayesian methodology for Markov Chain Monte Carlo (MCMC) sampling  
119 using the Metropolis algorithm. The 95% confidence intervals of projected daily and  
120 cumulative incidence were calculated using bootstrap resampling method with 1000  
121 samples.

## 122 **Results**

### 123 *Serial interval*

124 Till 24 June 2020, 2619 cases were reported from the district (Fig 2). Contacts of 522  
125 SARS-CoV-2 infected individuals were traced from 15 April – 20 June 2020 and  
126 among them 91 individuals had a positive contact history with a confirmed COVID-19  
127 case. Among them, serial interval data for 79 infector-infectee pairs was obtained  
128 (supplementary table 1). The mean serial interval was 6.75 days with a standard  
129 deviation of 3.76 days. The log-normal distribution was found to be the best fitting  
130 with serial interval with minimum Akaike Information Criterion value (Fig 3). The  
131 median and 95 percentile values of serial interval were 5.98 days (95% CI 5.39 –  
132 6.65) and 13.17 days (95% CI 11.27 – 15.57), respectively estimated from the fitted  
133 log-normal distribution.

### 134 *Estimation of $R_0$*

135 The overall  $R_0$  value in the first 30 days after reporting of first case was 1.64 (95%  
136 CI 1.12 – 2.25) which subsequently decreased to 1.07 (95% CI 1.06 – 1.09). The  
137 overall  $R_0$  value for the entire duration of 9 March – 24 June 2020 was 1.07 (95% CI  
138 1.06 – 1.09), whereas it was 1.17 (95% CI 1.06 -1.23) for the last 30 days.

139 The instantaneous  $R_0$  value calculated using the method by Jombart and Nouvellet  
140 *et al* yielded maximum values of 6.48 (95% CI 2.10 – 13.27) and 3.71 (95% CI 1.85 -  
141 2.08) using sliding time-windows of 7 days and 14 days respectively (Fig 4).  
142 Similarly, using the method developed by Wallinga and Teunis the maximum values  
143 of instantaneous  $R_0$  were 3.16 (95% CI 2.60 – 3.75) and 3.11 (95% CI 2.75 – 3.41),  
144 respectively (Fig 4). The latest instantaneous  $R_0$  value estimated on 24 June 2020,  
145 using the method by Jombart and Nouvellet *et al* were 0.99 (95% CI 0.88 – 1.11) and  
146 0.88 (95% CI 0.81 – 0.96) taking 7- and 14-days sliding time-windows, respectively.  
147 Similarly, the latest instantaneous  $R_0$  values estimated on 24 June 2020, using the  
148 method by Walling and Teunis were 0.22 (95% CI 0.18 – 0.27) and 0.47 (95% CI  
149 0.44 – 0.50) taking 7- and 14-days sliding time-windows, respectively.

#### 150 *Projection of epidemic size*

151 The number daily cases projected for the next month while taking a  $R_0$  value of 1.07  
152 (representing the entire duration of transmission from 9 March – 24 June 2020)  
153 ranged from 44 individuals (95% CI 32 -55) on day 1 to 64 individuals (95% CI 42 –  
154 87) on day 30 (Fig 5). Similarly, the number daily cases projected for the next month  
155 while taking a  $R_0$  value of 1.17 (representing only the last 30 days prior to 24 June  
156 2020) ranged from 46 individuals (95% CI 34 - 59) on day 1 to 85 individuals (95%  
157 CI 60 – 111) on day 30 (Fig 5). The cumulative projection of number of COVID-19  
158 case over the next 30 days while taking  $R_0$  value of 1.07 was 1563 individuals (95%  
159 CI 1281 – 1845). Similarly, the projection over next one month was 1881 individuals  
160 (95% CI 1542 – 2220) with input of  $R_0$  value of 1.17 considering the transmission  
161 most recent 30-days period. A scenario of 50% reduction in transmissibility above  
162 the maintenance level of  $R_0$  (i.e. from  $R_0$  of 1.17 to 1.085) assuming further  
163 strengthening of control measures resulted in 1450 (95% CI 1151 – 1750)

164 cumulative cases over the next month, corresponding to 23% reduction in projected  
165 case-load.

## 166 **Discussion**

### 167 *Implications of serial interval and $R_0$ estimation*

168 Our observation of mean serial interval fell within the range of 4-8 days estimated by  
169 a meta-analysis of 7 studies conducted during the early phase of the COVID-19  
170 pandemic.<sup>15</sup> Another meta-analysis including studies only from China estimated a  
171 range of serial interval from 4.10 – 7.5 days.<sup>16</sup> Our experience suggests that the  
172 median and 95% confidence interval estimate of serial interval should be reported  
173 alongside the mean and standard deviation as the former approach is more  
174 susceptible to be influenced by extreme values. It has also been suggested that  
175 longer serial interval intervals can be noted due to preventive interventions and  
176 during the course of the epidemic.<sup>17,18</sup> Therefore, it is preferable to estimate recent  
177 serial interval locally to better understand the transmission of SARS-CoV-2.

178 The distribution of  $R_0$  values was consistent with the observation from other  
179 countries indicating a similar transmission pattern.<sup>4,18</sup> Once the peak of  $R_0$  value was  
180 reached in the first week of April, subsequent reduction towards April end could be  
181 attributed to aggressive testing, contact tracing and isolation measures in the urban  
182 area of Jodhpur during the April month. Earlier detection of infection followed by  
183 isolation is known to reduce the  $R_0$  value through limiting both the duration of  
184 effective contact and the number of susceptibles an infected individual can come in  
185 contact with.<sup>9</sup> Our findings further support that parameters such as serial interval,  
186 incubation period and  $R_0$  values are likely to vary throughout the course of the  
187 epidemic and will depend on the local factors influencing transmission such as



188 demographics, environmental conditions, modelling methodology and the stringency  
189 of the control measures.<sup>9,19</sup>

### 190 *Projection of epidemic*

191 The projected estimate of daily case and the final outbreak size were found to  
192 depend on the value of  $R_0$  entered in the model.<sup>20,21</sup> The method used to estimate  
193 the  $R_0$  value and the time-window over which  $R_0$  was calculated influenced the final  
194 projection by a wide margin. The 14-days-time window yielded less variable  
195 instantaneous  $R_0$  estimates as compared to a 7-days-time window. We found that  
196 the method by Wallinga and Teunis was more sensitive to recent fluctuations in daily  
197 case count, as compared to the method by Jombart *et al*, while taking the same time  
198 window. Further, as per the renewal equation stated earlier, the values of  $R_0$  are  
199 most influenced by the trend in daily cases reported within the range of the serial  
200 interval i.e. within 5-6 days. This also pre-assumes homogenous mixing, which  
201 becomes less applicable with larger populations with cases emerging from widely  
202 separated clusters. Also, the impact of methods of  $R_0$  estimation and time windows  
203 were more pronounced when there was a fluctuating trend in cases or the  $R_0$  value  
204 was close to 1. Therefore, we recommend that  $R_0$  values over a comparatively  
205 larger period be taken instead of instantaneous  $R_0$  values for providing reliable  
206 projections in larger populations.

### 207 *Strengths and limitations*

208 One of the strengths of our study was estimation of serial interval based on large  
209 data over a period of two months. Also, since our study was based on contact history  
210 of infected individuals instead of daily follow-up of contacts of infected individuals for  
211 disease onset, we minimized underreporting of longer serial intervals which is

212 possible due to right-truncation in assessing serial interval based on follow-up  
213 method.<sup>22</sup> Further, our use of time-varying method for daily  $R_0$  estimation and  
214 maximum likelihood method for overall  $R_0$  estimation had the benefit of less bias as  
215 compared to exponential growth and sequential Bayesian methods.<sup>23</sup> The time-  
216 varying method had the added advantage of providing daily  $R_0$  values which were  
217 useful in assessing the effectiveness of control measures, as compared to other  
218 methods which provide only an aggregate  $R_0$  value.<sup>22</sup>

219 Population level estimates relying on daily reports could underestimate the value of  
220  $R_0$  as compared to those of closed populations, as many infected individuals are  
221 likely to be missed, especially if the testing capacity is limited or proportion of  
222 asymptomatics is high.<sup>20</sup> Further, modelling assumptions such as assuming a finite  
223 probability of interaction of infector-infectee pairs reported within a range of serial  
224 interval might not be applicable for large population cohorts.<sup>14</sup> In order to overcome  
225 such limitations use of both spatial and temporally structured data has been  
226 proposed.<sup>24</sup>

## 227 **Conclusions**

228 Public health measures such as testing, contact tracing and home isolation were  
229 found to reduce to instantaneous  $R_0$  value and could thereby reduce the final  
230 outbreak size. The final epidemic size was found to be influenced by  $R_0$  values,  
231 which in turn depended on the stringency of control measures. Even a marginal  
232 reduction in  $R_0$  as a result of strengthening control measures was found to  
233 considerably reduce the projected COVID-19 burden in Jodhpur, India. Projections  
234 are feasible based on publicly released daily COVID-19 case data and could be  
235 useful in guiding a data-driven COVID-19 response strategy at a local level. This

236 could be utilized for both surge capacity planning of number of hospital beds and  
237 ventilators required, and also for the public health response such as number of staff  
238 required for contact tracing and for provisioning of institutional quarantine or isolation  
239 facility. Therefore, considering the increasing case load and dynamic situation of  
240 COVID-19, a decentralized evidence-driven approach appears to be the need of the  
241 hour.

## 242 **AUTHOR STATEMENTS**

243 **Authors' contributions** – MKV, VG and SS collected the data and SS conducted  
244 the analysis. SS wrote the draft manuscript with further inputs from MKV, VG, AK,  
245 MKG and PB. PB coordinated the data collection process. SM provided overall  
246 supervision of the lab testing, clinical care and research related to COVID-19 at  
247 AIIMS - Jodhpur, India. All authors approved the final manuscript.

248 **Acknowledgements** – We acknowledge the district administration Jodhpur for  
249 providing the daily COVID-19 case data.

250 **Funding**– The authors declare that no funding was received from any source for the  
251 study and preparation of this article.

252 **Conflicts of interest** - The authors declare that there are no conflicts interests for  
253 publication of this article. The views expressed in this article are those of the authors  
254 alone and do not necessarily represent the views of their organizations.

255 **Ethical approval** – The study has been approved by the Institutional Ethics  
256 Committee of All India Institute of Medical Sciences (AIIMS) - Jodhpur, India.

## 257 **REFERENCES**

258 1. WHO. Situation Update no. 164 for COVID-19 – 2 July 2020. World Health  
259 Organization, Geneva; 2020. Available at: <https://www.who.int/docs/default->

- 260 source/coronaviruse/situation-reports/20200702-covid-19-sitrep-  
261 164.pdf?sfvrsn=ac074f58\_2 (accessed 3 July 2020).
- 262 2. Nowcasting and forecasting the potential domestic and international spread of the  
263 2019-nCoV outbreak originating in Wuhan, China: a modelling study - The Lancet  
264 [Internet]. [cited 2020 May 2]. Available from:  
265 [https://www.thelancet.com/journals/lancet/article/PIIS0140-6736\(20\)30260-9/fulltext](https://www.thelancet.com/journals/lancet/article/PIIS0140-6736(20)30260-9/fulltext)
- 266 3. Alimohamadi Y, Taghdir M, Sepandi M. Estimate of the Basic Reproduction Number for  
267 COVID-19: A Systematic Review and Meta-analysis. *J Prev Med Public Health*. 2020  
268 May;53(3):151–7.
- 269 4. Lv M, Luo X, Estill J, Liu Y, Ren M, Wang J, et al. Coronavirus disease (COVID-19): a  
270 scoping review. *Euro Surveill*. 2020;25(15).
- 271 5. Bulut C, Kato Y. Epidemiology of COVID-19. *Turk J Med Sci*. 2020 21;50(SI-1):563–70.
- 272 6. MoHFW. Revised guidelines for Home Isolation of very mild/pre-symptomatic COVID-  
273 19 cases (dated 10 May 2020). Ministry of Health and Family Welfare, Government of  
274 India, New Delhi; 2020. Available at:  
275 <https://www.mohfw.gov.in/pdf/RevisedguidelinesforHomelsofationofverymildpresymptomaticCOVID19cases10May2020.pdf> (accessed 9 June 2020).  
276
- 277 7. ICMR. Revised strategy of COVID-19 testing in India - version 3 (dated 20 March  
278 2020). Indian Council of Medical Research, New Delhi; 2020. Available at:  
279 [https://main.icmr.nic.in/sites/default/files/upload\\_documents/2020-03-  
280 20\\_covid19\\_test\\_v3.pdf](https://main.icmr.nic.in/sites/default/files/upload_documents/2020-03-20_covid19_test_v3.pdf) (accessed 18 May 2020).
- 281 8. Jackson C, Metcalfe P, Amdahl J. Flexsurv: A Platform for Parametric Survival  
282 Modeling in R. *Journal of Statistical Software* 2016;70(8):1-33.  
283 <https://doi.org/10.18637/jss.v070.i08>.
- 284 9. Delamater PL, Street EJ, Leslie TF, Yang YT, Jacobsen KH. Complexity of the Basic  
285 Reproduction Number (R0). *Emerging Infect Dis*. 2019;25(1):1–4.
- 286 10. Jombart T, Nouvellet P, Bhatia S, Kamvar ZN. Projections: Project future case  
287 incidence 2018. Available from: [https://CRAN.R-project.org/ package=projections](https://CRAN.R-project.org/package=projections)  
288 (accessed 30 June 2020).

- 289 11. Jombart T, Cori A, Nouvellet P. EarlyR: Estimation of Transmissibility in the Early  
290 Stages of a Disease Outbreak 2017. Available from: [https://cran.r-](https://cran.r-project.org/web/packages/earlyR/index.html)  
291 [project.org/web/packages/earlyR/index.html](https://cran.r-project.org/web/packages/earlyR/index.html) (accessed 30 June 2020).
- 292 12. Cori A, Cauchemez S, Ferguson NM, Fraser C, Dahlquist E, Demarsh PA, et al.  
293 EpiEstim: Estimate Time Varying Reproduction Numbers from Epidemic Curves 2020.  
294 Available from: <https://cran.r-project.org/web/packages/EpiEstim/index.html> (accessed  
295 30 June 2020).
- 296 13. Nouvellet P, Cori A, Garske T, Blake IM, Dorigatti I, Hinsley W, et al. A simple approach  
297 to measure transmissibility and forecast incidence. *Epidemics*. 2018 Mar 1;22:29–35.
- 298 14. Wallinga J, Teunis P. Different epidemic curves for severe acute respiratory syndrome  
299 reveal similar impacts of control measures. *Am J Epidemiol*. 2004 Sep 15;160(6):509–  
300 16.
- 301 15. Park M, Cook AR, Lim JT, Sun Y, Dickens BL. A Systematic Review of COVID-19  
302 Epidemiology Based on Current Evidence. *J Clin Med*. 2020 Mar 31;9(4).
- 303 16. Zhang P, Wang T, Xie SX. Meta-analysis of several epidemic characteristics of COVID-  
304 19. medRxiv. 2020 Jun 3;
- 305 17. Najafi F, Izadi N, Hashemi-Nazari S-S, Khosravi-Shadmani F, Nikbakht R, Shakiba E.  
306 Serial interval and time-varying reproduction number estimation for COVID-19 in  
307 western Iran. *New Microbes New Infect*. 2020 Jul;36:100715.
- 308 18. Liu Y, Gayle AA, Wilder-Smith A, Rocklöv J. The reproductive number of COVID-19 is  
309 higher compared to SARS coronavirus. *J Travel Med*. 2020 13;27(2).
- 310 19. Rocklöv J, Sjödin H, Wilder-Smith A. COVID-19 outbreak on the Diamond Princess  
311 cruise ship: estimating the epidemic potential and effectiveness of public health  
312 countermeasures. *J Travel Med*. 2020 May 18;27(3).
- 313 20. Zhang S, Diao M, Yu W, Pei L, Lin Z, Chen D. Estimation of the reproductive number of  
314 novel coronavirus (COVID-19) and the probable outbreak size on the Diamond  
315 Princess cruise ship: A data-driven analysis. *Int J Infect Dis*. 2020 Apr;93:201–4.
- 316 21. Tildesley MJ, Keeling MJ. Is  $R(0)$  a good predictor of final epidemic size: foot-and-  
317 mouth disease in the UK. *J Theor Biol*. 2009 Jun 21;258(4):623–9.

- 318 22. Aghaali M, Kolifarhood G, Nikbakht R, Saadati HM, Hashemi Nazari SS. Estimation of  
319 the serial interval and basic reproduction number of COVID-19 in Qom, Iran, and three  
320 other countries: A data-driven analysis in the early phase of the outbreak. *Transbound*  
321 *Emerg Dis.* 2020 May 30;
- 322 23. Obadia T, Haneef R, Boëlle P-Y. The R0 package: a toolbox to estimate reproduction  
323 numbers for epidemic outbreaks. *BMC Med Inform Decis Mak.* 2012 Dec 18;12:147.
- 324 24. Ng T-C, Wen T-H. Spatially Adjusted Time-varying Reproductive Numbers:  
325 Understanding the Geographical Expansion of Urban Dengue Outbreaks. *Scientific*  
326 *Reports.* 2019 Dec 16;9(1):19172.

## 327 **FIGURES**

328 Fig 1: Location of Jodhpur district within Rajasthan state of India

329 *(Modified from source file -*

330 [https://commons.wikimedia.org/wiki/File:India\\_districts\\_map.svg](https://commons.wikimedia.org/wiki/File:India_districts_map.svg), *Creative Commons*  
331 *Attribution-Share Alike 4.0 International license)*

332 Fig 2: Daily COVID-19 cases at Jodhpur, India from 9 March 2020- 24 June 2020

333 Fig 3: Estimates of median and 95 percentile of serial interval data as fitted to  
334 weibull, log-normal, log-logistic and generalized gamma distributions (n = 79 pairs)

335 Fig 4: Instantaneous R0 values for Jodhpur, India estimated using method by  
336 Jombart et al (a-b) and by Wallinga and Teunis (c-d) using time windows of 7 and 14  
337 days

338 Fig 5: Projection of daily and cumulative COVID-19 case-load over the next 30 days  
339 using R0 value of 1.07 for overall duration till 24 June 2020 (a - b) and R0 value of  
340 1.17 for one month preceding 24 June 2020 (c - d)

## 341 **Supplementary file**

342 **Supplementary table 1: Data for ‘Serial interval estimation of COVID-19 in**  
343 **Jodhpur, India’**

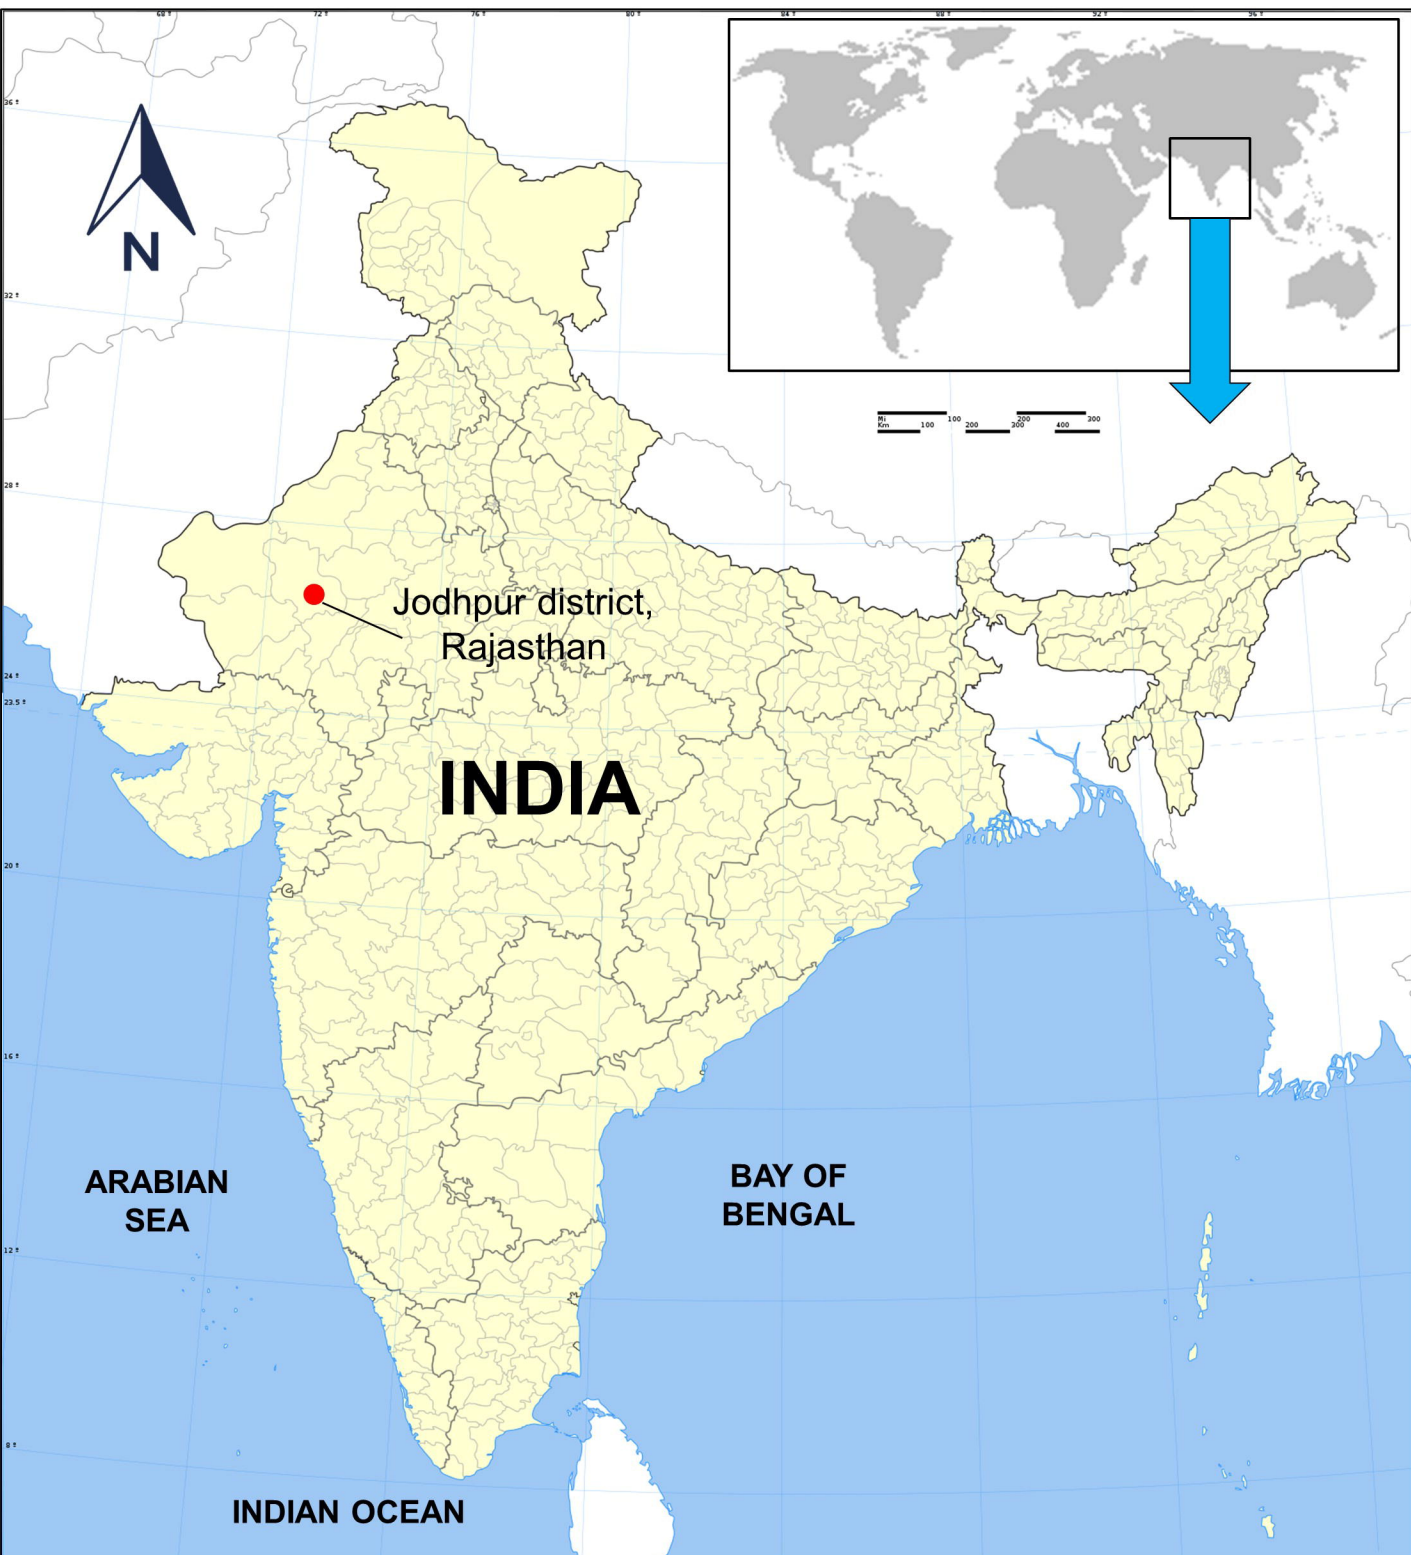

**ARABIAN  
SEA**

**BAY OF  
BENGAL**

**INDIAN OCEAN**

**INDIA**

Jodhpur district,  
Rajasthan

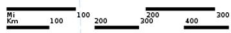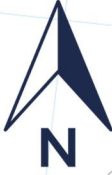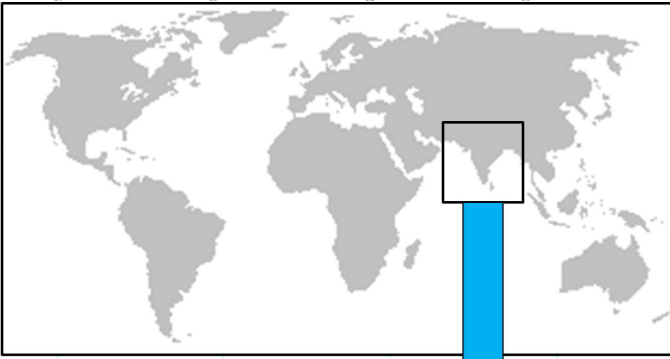



Number of COVID-19 cases reported daily

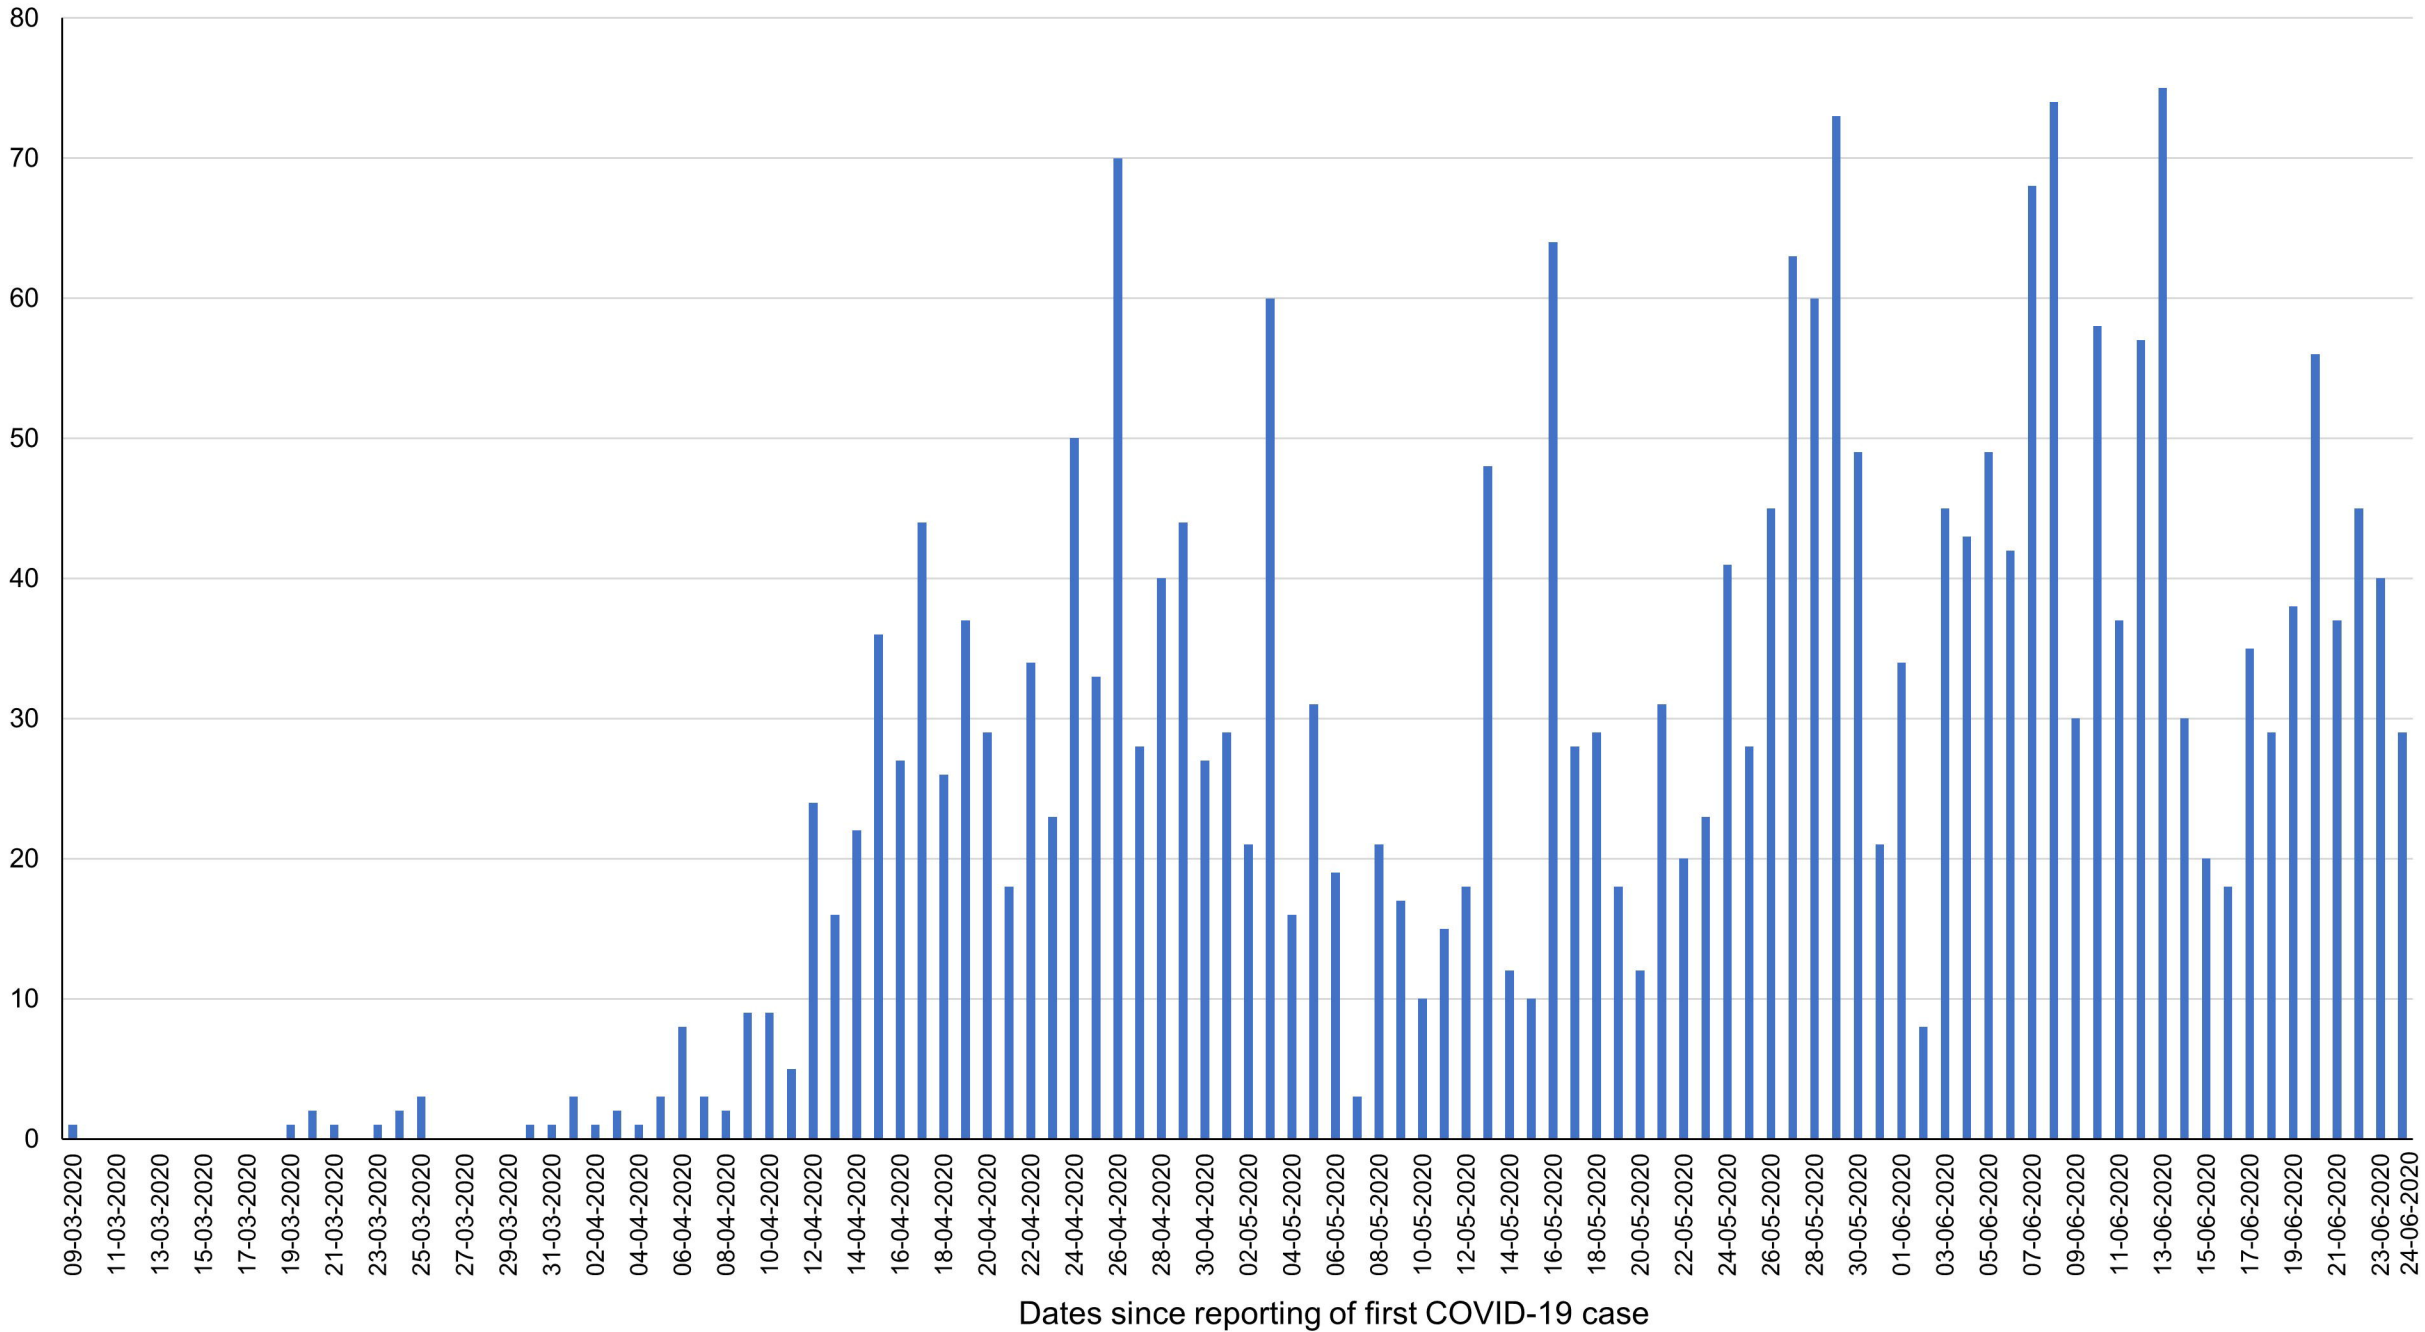



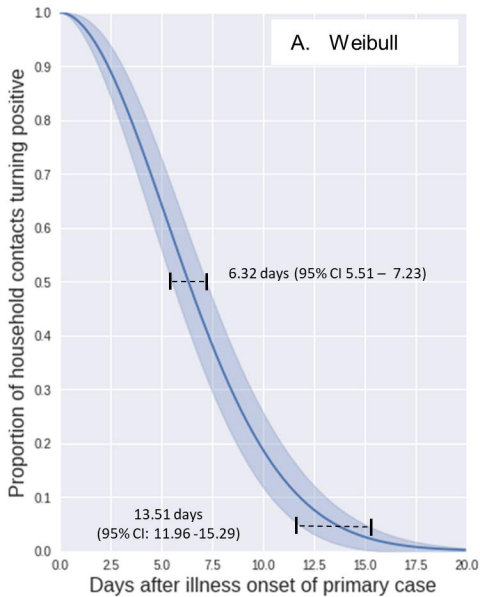

AIC = 415.73

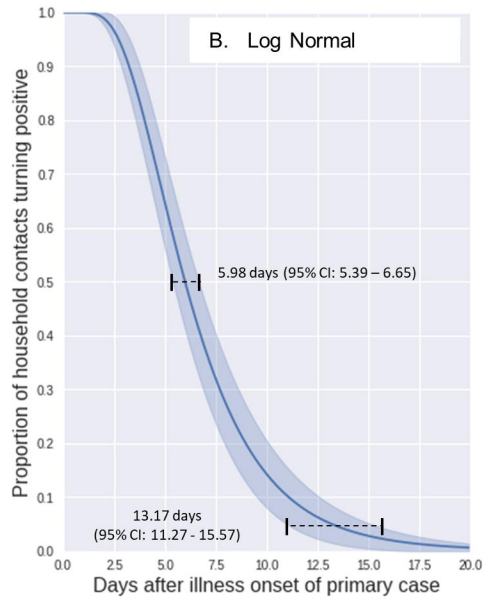

AIC = 394.81

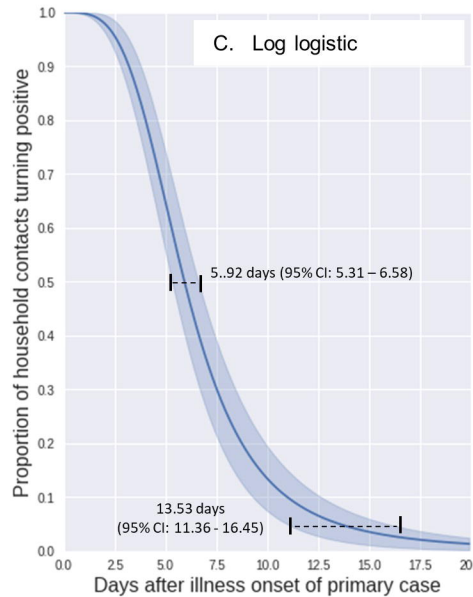

AIC = 398.06

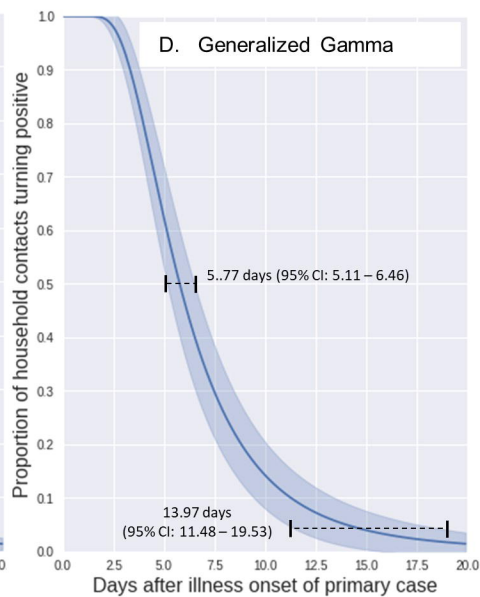

AIC = 394.94

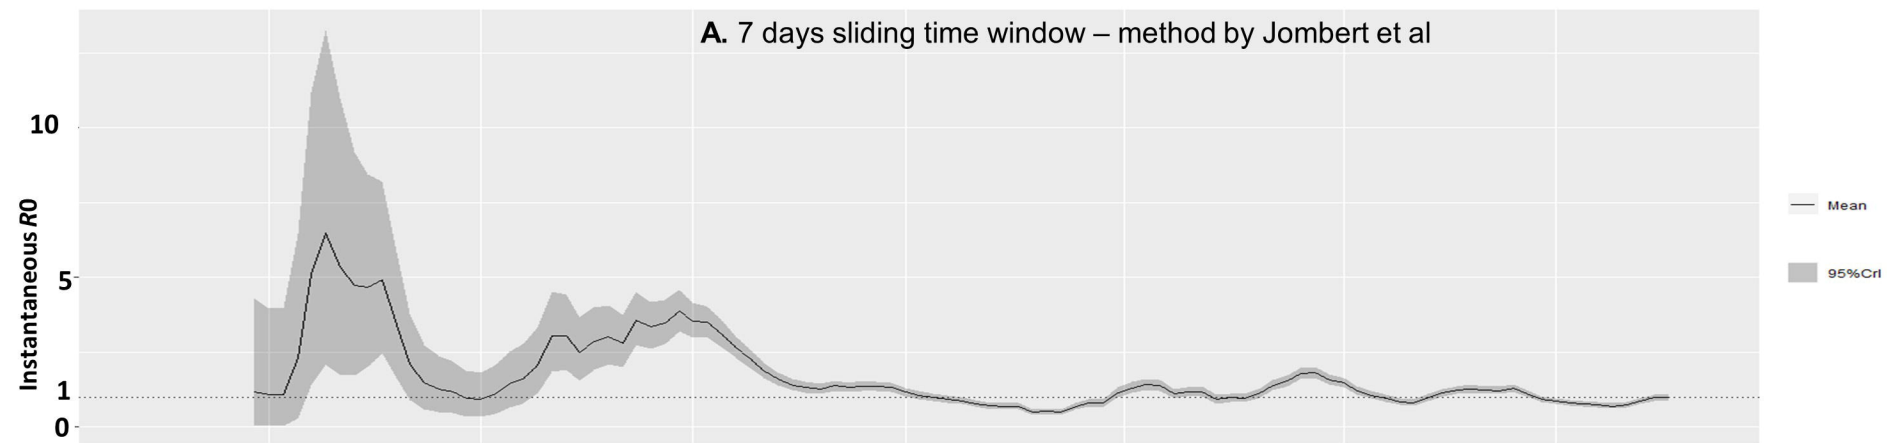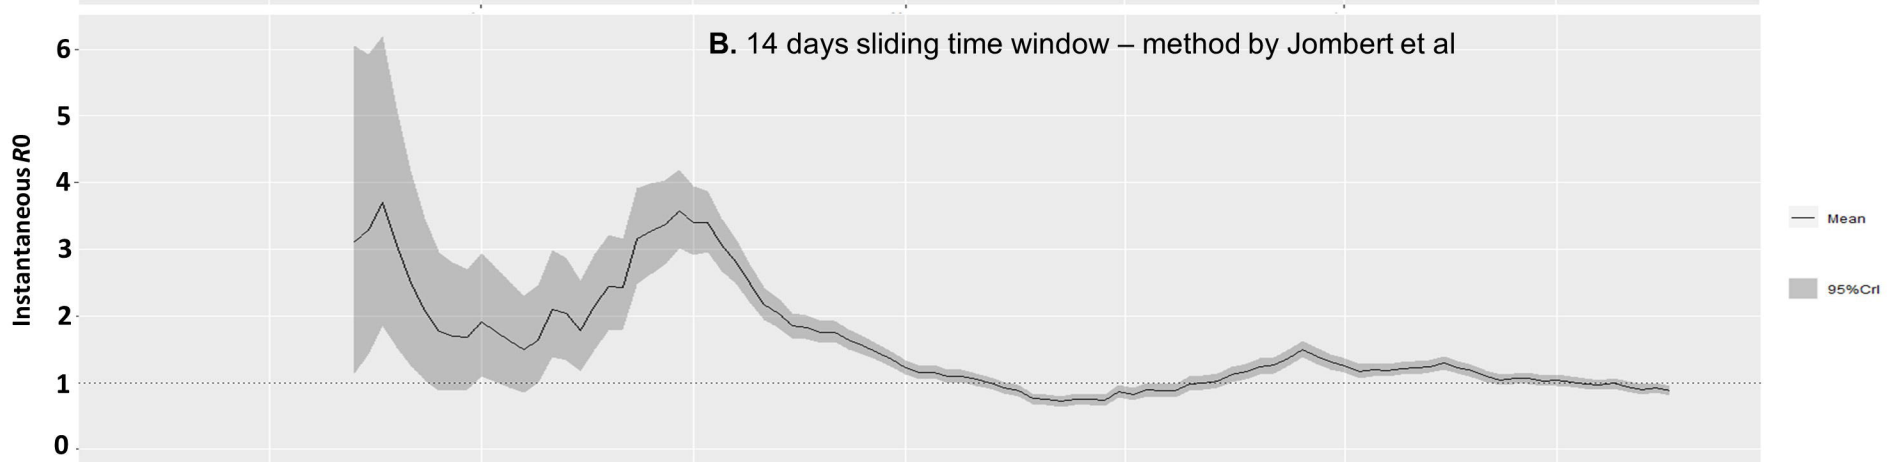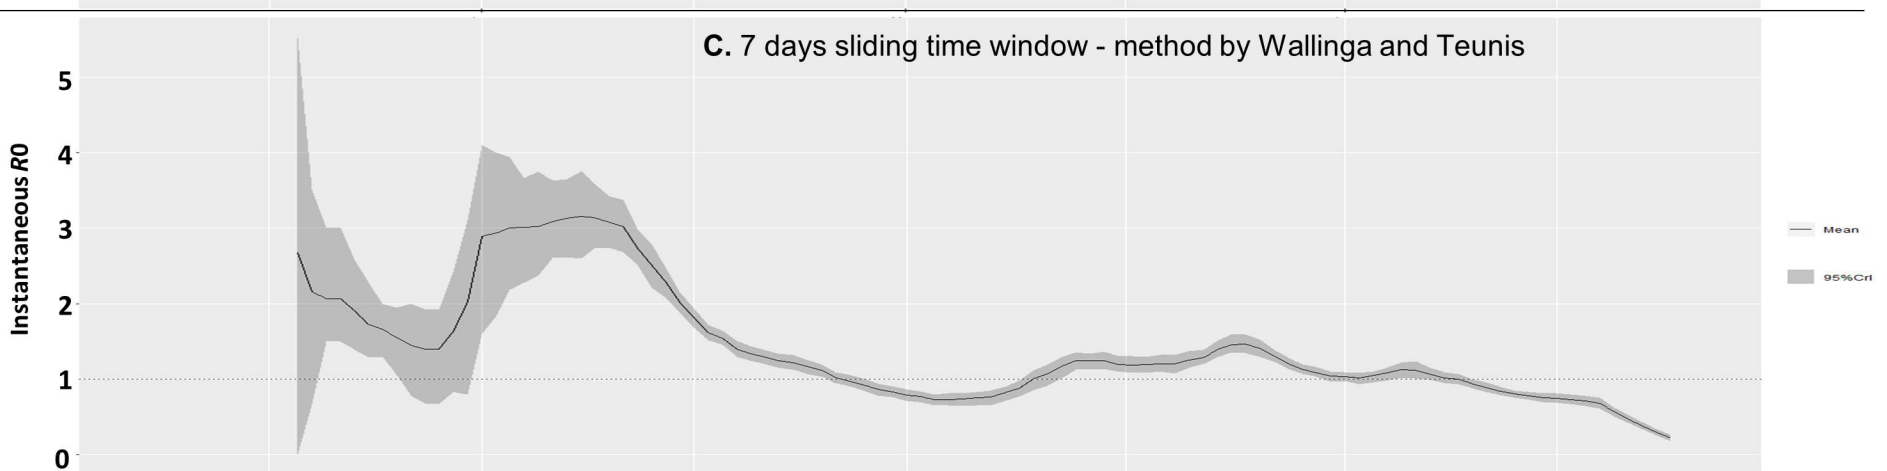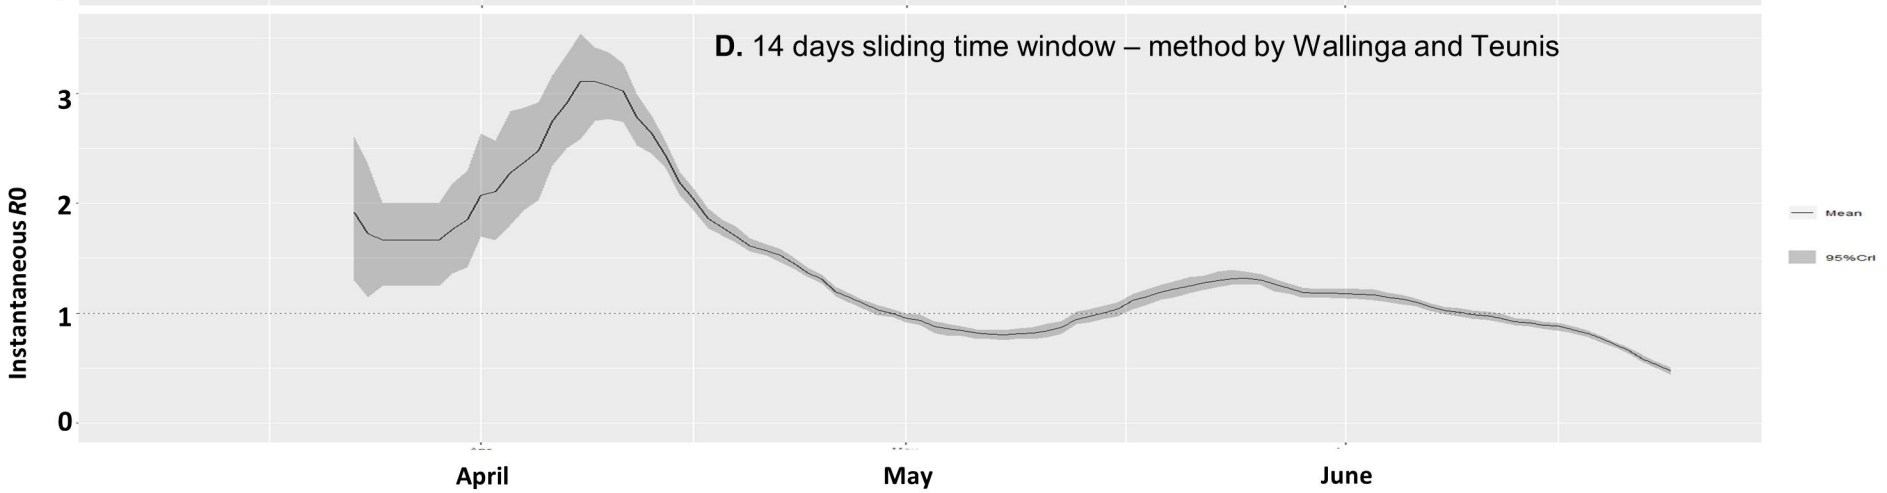

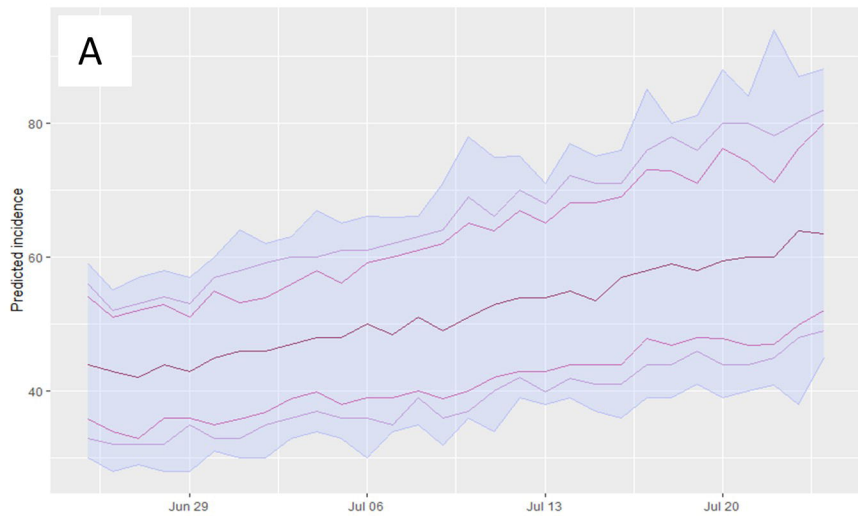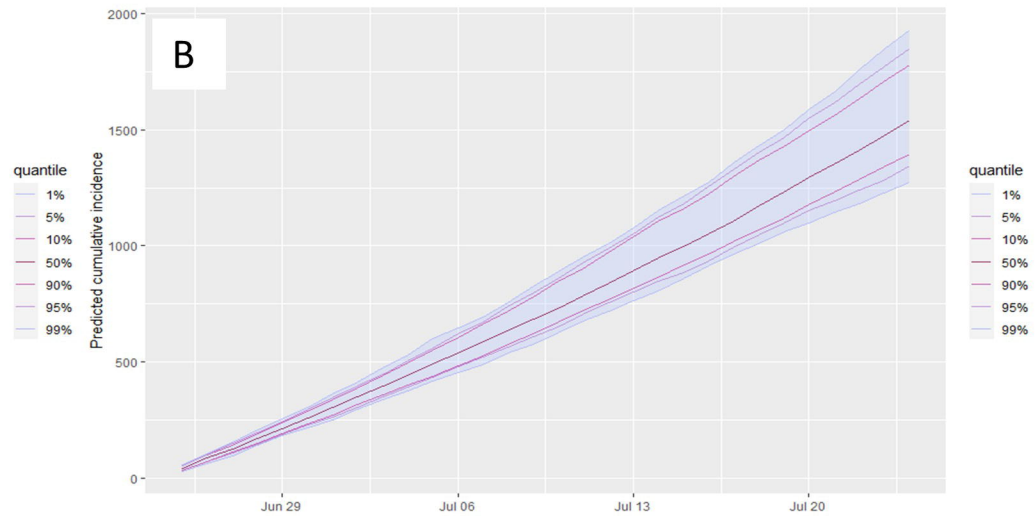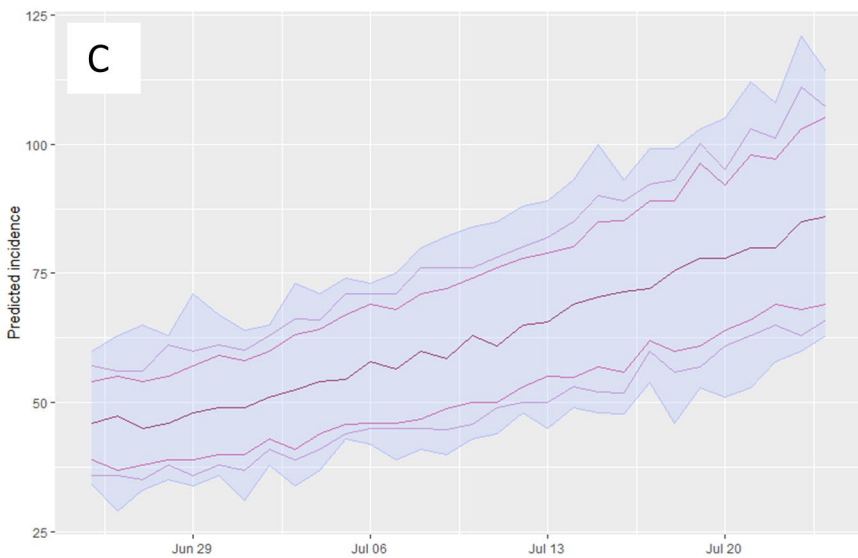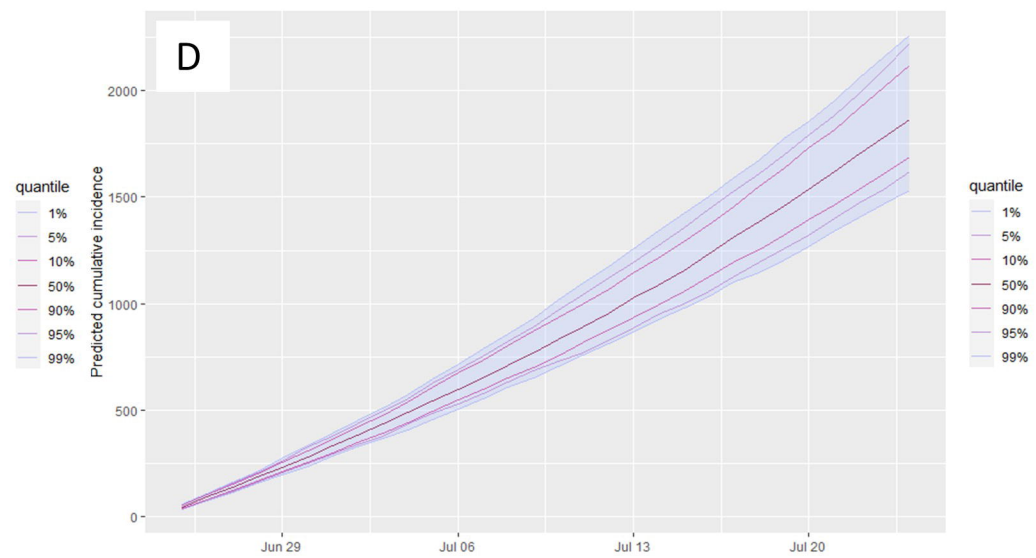

Source: https://www.medrxiv.org/content/medrxiv/early/2020/07/04/2020.07.03.20146167.full.pdf
